# Supplementary material
Source: PubMed Central journal article supplement (PMC6068039)

**Cereblon loss and up-regulation of c-Myc are associated with lenalidomide resistance in multiple myeloma patients**

Laurens E. Franssen,<sup>1</sup> Inger S. Nijhof,<sup>1</sup> Suzana Couto,<sup>2</sup> Mark-David Levin,<sup>3</sup> Gerard M.J. Bos,<sup>4</sup> Annemiek Broijl,<sup>5</sup> Saskia K. Klein,<sup>6</sup> Yan Ren,<sup>2</sup> Maria Wang,<sup>2</sup> Harry R. Koene,<sup>7</sup> Andries C. Bloem,<sup>8</sup> Aart Beeker,<sup>9</sup> Laura M. Faber,<sup>10</sup> Ellen van der Spek,<sup>11</sup> Reimier Raymakers,<sup>12</sup> Roos J. Leguit,<sup>13</sup> Pieter Sonneveld,<sup>5</sup> Sonja Zweegman,<sup>1</sup> Henk Lokhorst,<sup>1</sup> Tuna Mutis,<sup>1</sup> Anjan Thakurta,<sup>14</sup> Xiaozhong Qian<sup>14</sup> and Niels W.C.J. van de Donk<sup>1</sup>

<sup>1</sup>Department of Hematology, VU University Medical Center, Amsterdam, the Netherlands; <sup>2</sup>Department of Exploratory Toxicology, Celgene, San Diego, CA, USA; <sup>3</sup>Department of Internal Medicine, Albert Schweitzer Hospital, Dordrecht, the Netherlands; <sup>4</sup>Department of Hematology, Maastricht University Medical Center, the Netherlands; <sup>5</sup>Department of Hematology, Erasmus Medical Center, Rotterdam, the Netherlands; <sup>6</sup>Department of Internal Medicine, Meander Medical Center, Amersfoort, the Netherlands; <sup>7</sup>Department of Hematology, St. Antonius Hospital, Nieuwegein, the Netherlands; <sup>8</sup>Laboratory for Translational Immunology, University Medical Center Utrecht, the Netherlands; <sup>9</sup>Department of Internal Medicine, Spaarne Hospital, Hoofddorp, the Netherlands; <sup>10</sup>Department of Internal Medicine, Rode Kruis Hospital, Beverwijk, the Netherlands; <sup>11</sup>Department of Internal Medicine, Rijnstate Hospital, Arnhem, the Netherlands; <sup>12</sup>Department of Hematology, University Medical Center Utrecht Cancer Center, the Netherlands; <sup>13</sup>Department of Pathology, University Medical Center Utrecht, the Netherlands and <sup>14</sup>Department of Translational Development, Celgene Corporation, Summit, NJ, USA

Correspondence: n.vandedonk@vumc.nl

doi:10.3324/haematol.2017.186601

## **Supplemental data**

### **Supplementary Methods**

#### **Patients**

Patients were eligible to participate in the REPEAT study if they had lenalidomide-refractory disease following at least 1 prior therapy. Lenalidomide-refractory MM was defined as progressive disease during therapy, no response (less than partial response) to prior lenalidomide-containing therapy, or progression within 60 days of discontinuation from lenalidomide-containing regimens, according to the International Myeloma Working Group criteria.<sup>1</sup> The study was approved by the institutional medical ethical committee in each participating center in accordance with the declaration of Helsinki. All participants provided written informed consent. The trial was registered at [www.clinicaltrials.gov](http://www.clinicaltrials.gov) as #NCT01352338.

#### **Immunohistochemistry**

Sequential dual color immunohistochemistry (IHC) assays were performed as previously described<sup>2,3</sup>, except for the addition of Dako Protein Block (Catalog No. X0909) immediately before applying the CD138 antibody to reduce nonspecific background.

Primary antibodies used were: Cereblon, Celgene custom rabbit monoclonal, CRBN65, used at 1/2000; Aiolos, Celgene custom rabbit monoclonal, Clone 9B-9-7, used at 1/400; Ikaros, Celgene custom rabbit monoclonal, Clone 36-8-5, used at 1/12000; IRF4, mouse monoclonal, Dako, Catalog No. M7259, Clone MUM1P, used at 1/7500; c-Myc, rabbit monoclonal, Abcam, Catalog No. ab32072, Clone Y69, used at 1/200; CD138, mouse monoclonal, Dako, Catalog No. M7228, Clone MI15, used at 1/1200. Mouse monoclonal IgG1 (BD Bioscience; Catalog No 550878) and rabbit monoclonal IgG (Abcam, Catalog No. Ab172730) were used

as isotype controls at the matched concentrations as the respective primary antibodies. All slides were counterstained with hematoxylin.

Evaluation of dual color IHC slides was performed by board-certified pathologists under the light microscope. The target markers Cereblon (cytoplasmic and nuclear), Aiolos (nuclear), Ikaros (nuclear), IRF4 (nuclear), and c-Myc (nuclear) were evaluated in at least 100 CD138 (membrane) positive plasma cells in the bone marrow to generate an H-score. H-scores range from 0 to 300 and take into account frequency and intensity of staining [H-score = (% at 1+) X 1 + (% at 2+) X 2 + (% at 3+) X 3]. For Cereblon, cytoplasmic and nuclear compartments were scored separately. The sum of cytoplasmic and nuclear H-Scores accounted for the total H-Score (0-600), which was generated for each sample. This dual color IHC assay has been validated previously, showing a high specificity for a wide range of Cereblon expression levels, a low coefficient of variation for cytoplasmic and nuclear H-scores of 5% and 2% respectively, and good inter-pathologist concordance with an average  $R^2 = 0.73$ .<sup>2</sup>

## **Statistics**

Continuous variables were analyzed using Wilcoxon matched-pairs test or a Mann-Whitney U test. Differences in categorical variables were determined with the Fisher's exact test for two by two tables and otherwise with the Pearson's  $\chi^2$  test. Results are expressed as 2-tailed *P* values. A level of  $P < 0.05$  was considered significant. Progression-free survival (PFS) was calculated from inclusion in the REPEAT study until progression or death from any cause. Overall survival (OS) was measured from diagnosis and from inclusion in the REPEAT study until death from any cause. Prognostic factors for PFS and OS were analyzed for statistical significance using the Cox proportional hazard model. Calculations were performed in SPSS version 20.0.0 (IBM SPSS Inc., Armonk, NY, USA) and GraphPad Prism version 5.03 (GraphPad Software Inc., La Jolla, CA, USA). Correlations of various patient- and tumor-

related factors with clinical response to REP treatment were only performed for patients treated at the RDL.

1. Kumar SK, Lee JH, Lahuerta JJ, et al. Risk of progression and survival in multiple myeloma relapsing after therapy with IMiDs and bortezomib: a multicenter international myeloma working group study. *Leukemia*. 2012;26(1):149–57.
2. Ren Y, Wang M, Couto S, et al. A Dual Color Immunohistochemistry Assay for Measurement of Cereblon in Multiple Myeloma Patient Samples. *Appl. Immunohistochem. Mol. Morphol.* 2015;0(0):1–8.
3. Gandhi AK, Mendy D, Waldman M, et al. Measuring cereblon as a biomarker of response or resistance to lenalidomide and pomalidomide requires use of standardized reagents and understanding of gene complexity. *Br. J. Haematol.* 2014;164(2):233–44.

## **Supplemental figure.**

### **Supplemental figure 1. Immunohistochemical staining of Cereblon, Ikaros, Aiolos, IRF4 and c-Myc in CD138+ bone-marrow plasma cells of MM patients.**

Multiple myeloma BM core biopsies stained with dual CD138 (red membrane) and Cereblon (brown nucleus and cytoplasm- 1st column), Ikaros (brown nucleus - 2nd column), Aiolos (brown nucleus -3rd column), IRF4 (brown nucleus - 4th column), or c-Myc (brown nucleus - 5th column). Shown are two representative patients at the time of diagnosis (upper panel) and lenalidomide-refractory disease (lower panel). Decreased Cereblon and increased c-Myc expression are noted upon development of lenalidomide resistance. Aiolos, Ikaros and IRF4 remain unchanged. H-scores range from 0 to 600 for Cereblon and from 0-300 for the remaining stains. Abbreviations: Len, lenalidomide.

Supplementary  
Figure 1

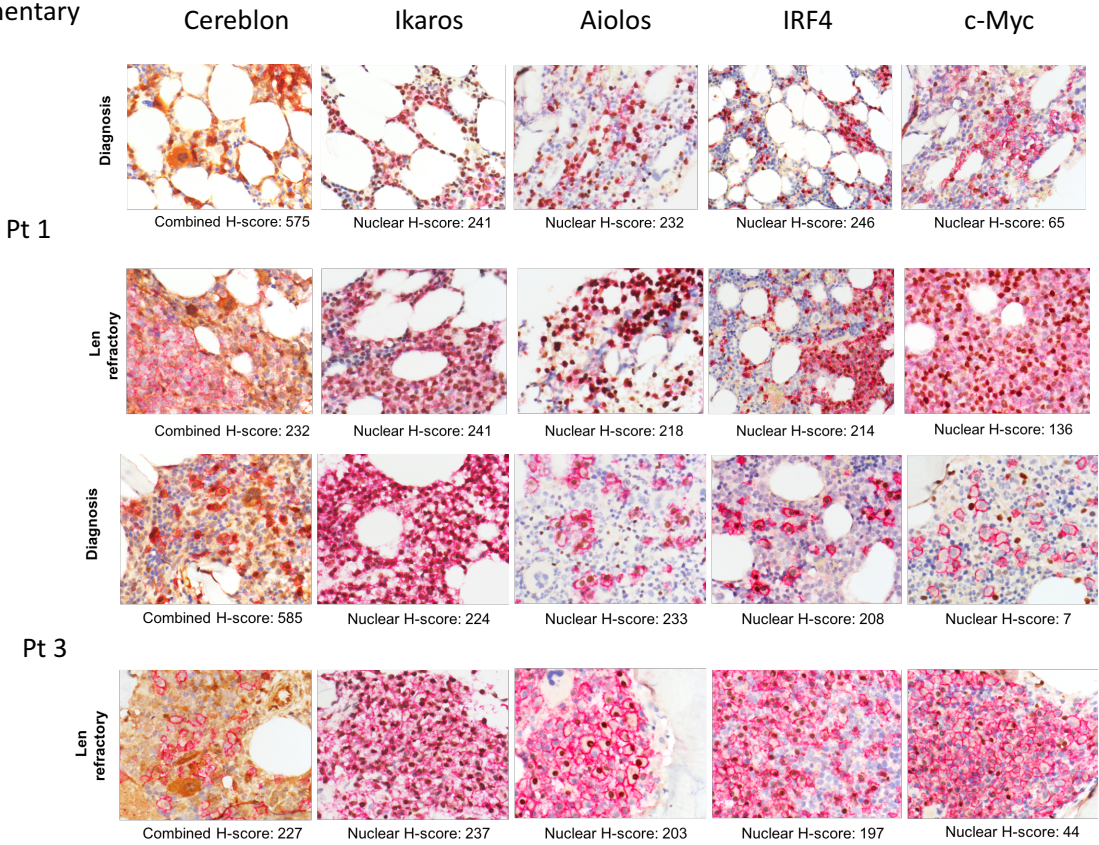

Supplement: 2017.186601.FRANSSEN_SUPPL.pdf [file 2017.186601.FRANSSEN_SUPPL.pdf]
