# Supplementary material
Source: PubMed Central journal article supplement (PMC6068039)
Supplement: 2017_186601-Disclosures_and_Contributions.pdf [file 2017_186601-Disclosures_and_Contributions.pdf]

Haematologica  
HAEMATOL/2017/186601  
Version 3

Cereblon loss and up-regulation of c-Myc are associated with  
lenalidomide resistance in multiple myeloma patients

Laurens E. Franssen, Inger S. Nijhof, Suzana Couto, Mark-David Levin,  
Gerard M.J. Bos, Annemiek Broijl, Saskia K. Klein, Yan Ren, Maria  
Wang, Harry R. Koene, Andries C. Bloem, Aart Beeker, Laura M.  
Faber, Ellen van der Spek, Reinier Raymakers, Roos J. Leguit, Pieter  
Sonneveld, Sonja Zweegman, Henk Lokhorst, Tuna Mutis, Anjan  
Thakurta, Xiaozhong Qian, and Niels W.C.J. van de Donk

Disclosures: S.C., Y.R., M.W., A.T., and X.Q. are Celgene employees. H.M.L., T.M., S.Z., and N.W.C.J.v.d.D. received research support from Celgene. S.Z., M.D.L. and N.W.C.J.v.d.D were advisory board members for Celgene. The remaining authors declare no competing interests regarding this study.

Contributions: LEF wrote the manuscript and analyzed the data, ISN coordinated the clinical study, SC coordinated and analyzed the IHC data, YR and MW performed the IHC staining, TM, AT, XQ and NWCJvdD designed the study and supervised the analyses, ACB analyzed the results, MDL, GMJB, AB, SKK, HRK, ABee, LMF, EvdS, RR, PS, SZ and HL included and treated patients. RJL coordinated the collection of BM slides.
